# Supplementary material
Source: Springer Nature journal article supplement (https://www.springermedizin.de/resource/supplementary/13024_2011_227_MOESM2_ESM.pdf/9643712)

## Health Control

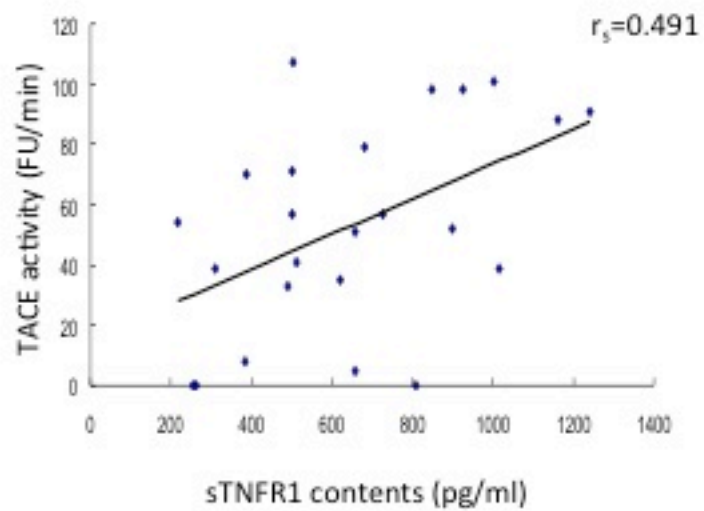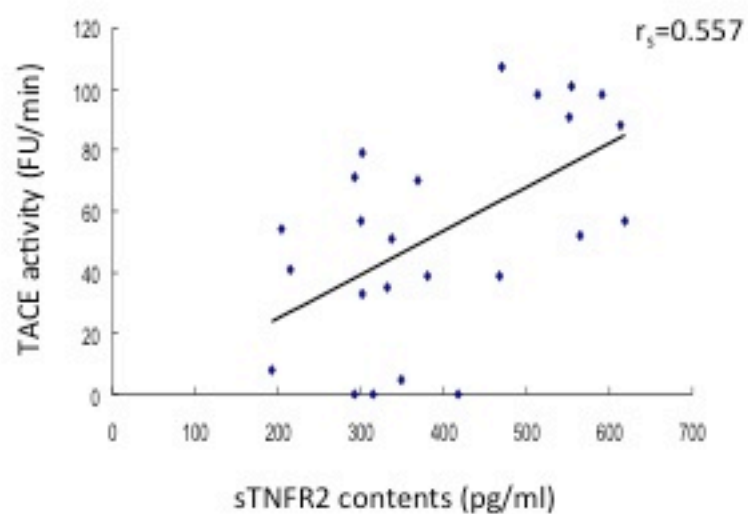

Supplement: MOESM2 [file 9643712]
